# Supplementary material for: Water-assisted crystallization of mesoporous anatase TiO2nanospheres
Source: Royal Society of Chemistry journal article supplement (doi:10.1039/c6nr01892k), 2016-01-01
Supplement: c6nr01892k1.pdf [file c6nr01892k1.pdf]

## Supporting information

### Water-Assisted Crystallization of Mesoporous Anatase TiO<sub>2</sub> Nanospheres

Na Li, Qiao Zhang, Ji Bong Joo, Zhenda Lu, Michael Dahl, Yang Gan, Yadong Yin\*

#### *Experimental*

##### *Chemicals*

Hydroxypropyl cellulose (HPC), sodium fluoride, sodium chloride,  $\beta$ -casein were purchased from Aldrich Chemical Co. Tetrabutyl orthotitanate (TBOT) was obtained from Fluka. Dimethyl sulfoxide (DMSO) and ethanol (200 proof) were obtained from Fisher Scientific. All solutions were prepared in deionized water (18 M $\Omega$ ) using a MilliQ<sup>TM</sup> water purification system (Millipore, Billerica, Ma, USA).

##### *Synthesis of TiO<sub>2</sub> nanoparticles*

TiO<sub>2</sub> spheres with an average diameter of ca. 200 nm were synthesized through a sol-gel method. In a typical synthesis, 0.85 mL of tetrabutyl orthotitanate (TBOT) was added to a mixture of 300  $\mu$ L of sodium chloride (0.04 M), 0.15g hydroxypropyl cellulose (HPC), and 50 mL of 200-proof ethanol under the protection of N<sub>2</sub> atmosphere. After sitting for 3 h, the products were centrifuged and washed with 200-proof ethanol for several times.

##### **Preparation of microporous TiO<sub>2</sub> particles**

The titania particles were isolated, washed with water, and then re-dispersed into a mixture of 19 mL of de-ionized water and 1 mL of NaF (1mg/10mL), followed by heating at desired temperature for an appropriate time under magnetic stirring. Samples were vacuum dried for 2 h to remove water residual before being used in the enrichment experiments and other measurements.

##### *Enrichment of phosphorylated protein ( $\beta$ -casein) using the microporous TiO<sub>2</sub>*

In a typical experiment, 1 mg  $\beta$ -casein was dissolved in 1 mL water and used as stock solution. 20 mg TiO<sub>2</sub> sample and 20  $\mu$ L of stock solution were added to 1 mL Milli-Q<sup>TM</sup> water and incubated at 25 °C for 1.5 h. The suspension was then centrifuged at

11000 rpm for 4 minutes to discard the precipitate and the supernatant was collected for CE analysis.

### ***Characterization***

The sample morphology was characterized by using transmission electron microscopy (TEM, Tecnai T12). The crystalline structures were evaluated by X-ray diffraction (XRD) analysis using a Bruker D8 Advance Diffractometer with Cu K $\alpha$  radiation ( $\lambda=1.5406$  Å). Nitrogen adsorption isotherms were obtained at 77K using a nitrogen sorption instrument (Micromeritics ASAP 2010). Pore size distributions were calculated by the BJH method using the adsorption branches of the isotherm. The capillary electrophoresis experiments were performed on a P/ACETM MDQ Glycoprotein Capillary Electrophoresis System (Beckman Coulter, Fullerton, CA, USA). A 40-cm fused-silica capillary (75 $\mu$ L id, 365 $\mu$ L od, Polymicro Technologies, Phoenix, AZ, USA) with an effective length of 30 cm was used. For CE separation, the capillary was treated by 0.1 N NaOH for minutes and then water for 1 minute at 30 psi before being filled with the 10 mM borate buffer. The sample was injected hydrodynamically at 0.5 psi for 5s, and the separation was performed at +25kV with UV-absorption detection at 200 nm.

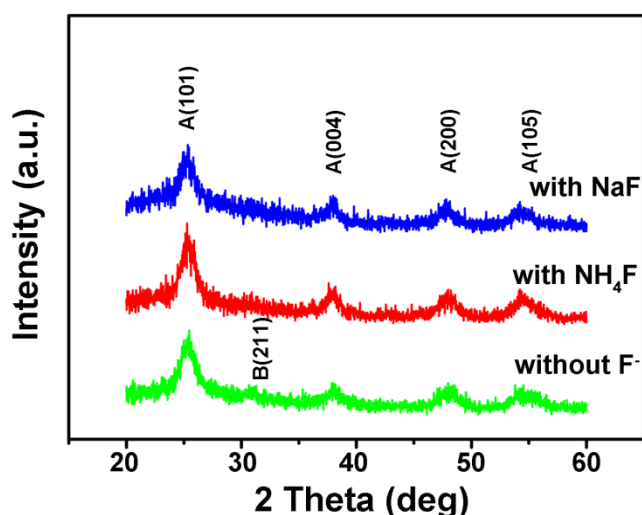

**Figure S1.** XRD patterns of TiO<sub>2</sub> particles obtained by heating the samples at 75 °C in aqueous solutions with and without F<sup>-</sup> ions.

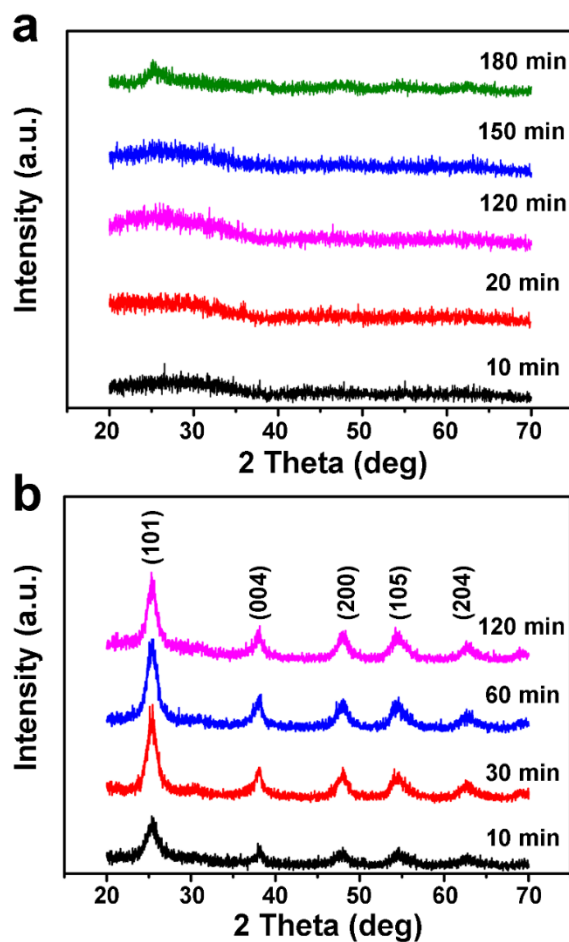

**Figure S2.** XRD patterns of TiO<sub>2</sub> particles obtained by heating at different temperatures: (a) 50 °C; and (b) 100 °C.

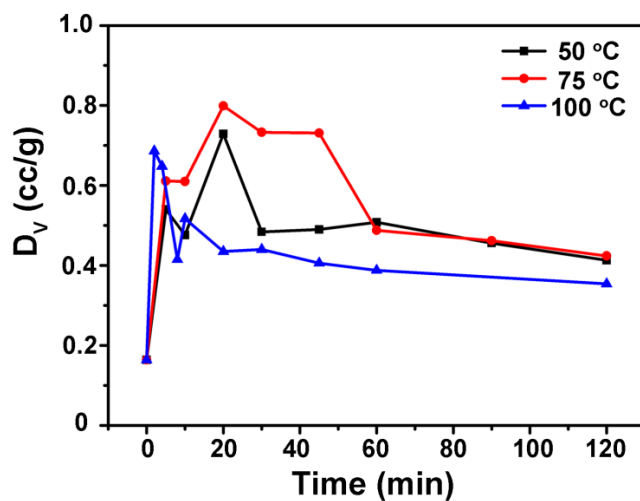

**Figure S3.** Change of pore volume as a function of heating time for TiO<sub>2</sub> particles treated at three different temperatures.

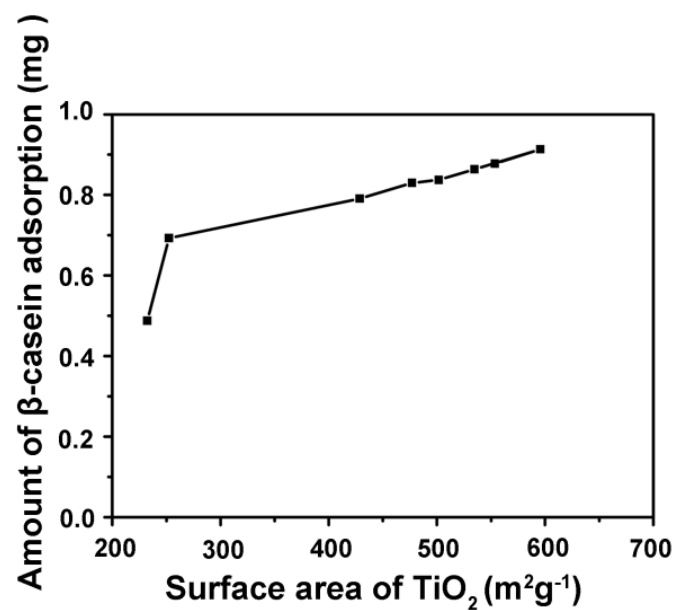

**Figure S4.** Quantitative correlation between the surface area of the  $\text{TiO}_2$  and the adsorbed amount of  $\beta$ -casein for 20 mg of  $\text{TiO}_2$  sample prepared by heating in water at 50 °C.
